# Supplementary material for: Interaction with adipocyte stromal cells induces breast cancer malignancy via S100A7 upregulation in breast cancer microenvironment
Source: Springer Nature journal article supplement (doi:10.1186/s13058-017-0863-0), 2017-06-19

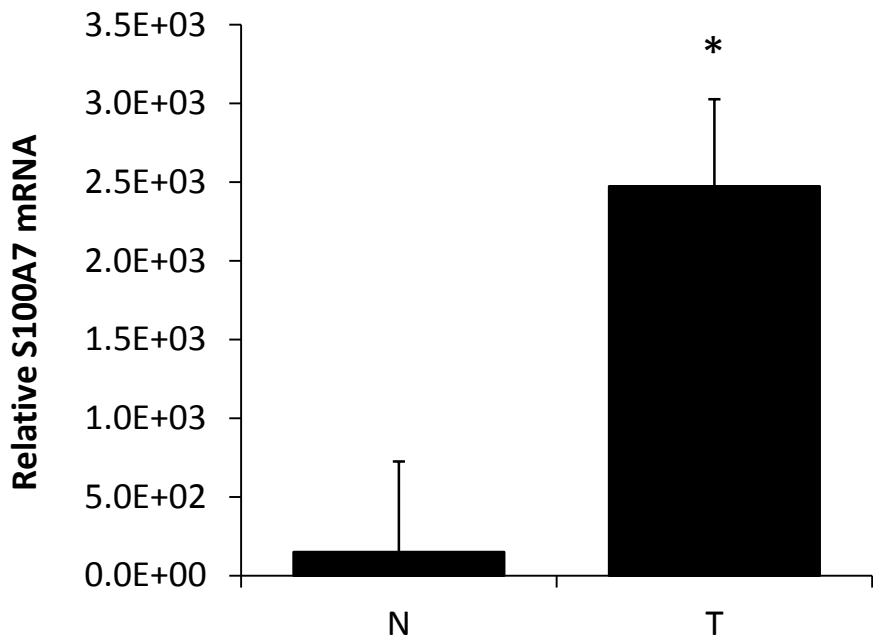

Supplement: MOESM3 [file 12454838]
